# Supplementary material for: Digital Genotyping of Macrosatellites and Multicopy Genes Reveals Novel Biological Functions Associated with Copy Number Variation of Large Tandem Repeats
Source: PLoS Genet. 2014 Jun 19;10(6):e1004418. doi: 10.1371/journal.pgen.1004418 (PMC4063668; doi:10.1371/journal.pgen.1004418)
Supplement: Table S10 — Probe alignments, probe counts and relative copy numbers obtained in five species of primate compared to the human mean. (XLSX) [file pgen.1004418.s015.xlsx]

## Sheet: Sheet1
Supplementary Table 10. Probe alignments, probe counts and relative copy numbers obtained in five species of primate compared to the human mean.
	Gorilla										Chimpanzee								Rhesus macaque								Gibbon			Bonobo
Probe name	BLAT alignment Chr	BLAT alignment Start (Gor3.61)	BLAT alignment End (Gor3.61)	BLAT alignment % identity	# of BLAT hits >90% identity	Normalized probe count_gorilla1	Fold change versus human mean_gorilla1	Normalized probe count_gorilla2	Fold change versus human mean_gorilla2		BLAT alignment Chr	BLAT alignment start (panTro2)	BLAT alignment end (panTro2)	BLAT alignment % identity	# of BLAT hits >90% identity	Normalized probe count	Fold change versus human mean		BLAT alignment Chr	BLAT alignment start (rheMac2)	BLAT alignment end (rheMac2)	BLAT alignment % identity	# of BLAT hits >90% identity	Normalized probe count	Fold change versus human mean		Normalized probe count	Fold change versus human mean		Normalized probe count	Fold change versus human mean
AMY1A	1, 1, 1	106624623, 106649228, 106709111	106624524, 106649327, 106709012	98, 98, 98	3	565.809	0.388162	748.307	0.513361		1, 1, 1	105422958, 105373298, 105462273	105423057, 105373397, 105462372	98.00%, 97.00%, 97.00%	3	476.143	0.326648		1, 1	106592294, 106550109	106592393, 106550207	99.00%, 94.00%	2	615.487	0.422242		658.962	0.452068		829.337	0.56895
ANAPC11	5	1292260	1292342	100	1	639.336	0.915593	709.446	1.016		17	82110593	82110675	0.988	1	703.671	1.00773		16	77327740	77327821	0.952	1	374.48	0.536293		434.461	0.622192		586.939	0.840556
ANKRD20A3	9, 9, 9	43189050, 43180299, 43187370	43189137, 43180386, 43187457	100, 98.86, 97.73	3	1765.21	0.261043	2182.65	0.322775		9, 9, 2a, 18, 21, 13, Un, Un	65538126, 44495184, 95727039, 2272632, 14050016, 18349382, 8948667, 6543875	65538213, 44495271, 95727126, 2272720, 14050104, 18349470, 8948755, 6543963	100.00%, 100.00%, 98.90%, 96.60%, 96.60%, 95.50%, 95.50%, 95.50%	14	5611.23	0.829799		3, 9, 10	34337368, 470293, 60963216	34337456, 470381, 60963304	96.60%, 95.50%, 94.40%	3	1491.37	0.220546		689.058	0.101899		4345.35	0.642599
ANXA8L1	10, 10, 10	58828867, 58454183, 59149350	58828946, 58454104, 59149429	100, 100, 98.75	3	951.823	1.0066	866.658	0.916532		10	46908924	46909003	0.988	1	872.356	0.922558		9	49706247	49706326	0.988	1	438.079	0.463289		839.538	0.887851		911.802	0.964273
AREG	4	83373459	83373360	99	1	253.322	0.400267	582.851	0.920946		4	56038600	56038699	0.99	1	695.826	1.09945		5	55122815	55122914	0.97	1	555.235	0.877311		624.799	0.987227		581.942	0.91951
ARL17B	5	37764224	37764312	98.89	1	483.092	0.443875	586.973	0.539323		17	11128491	11128579	0.956	1	507.526	0.466326		16	56251993	56252080	0.921	1	7.39197	0.00679191		578.434	0.531478		651.912	0.598991
ATG4B	2b	131401096	131401027	100	1	510.664	1.04139	504.539	1.0289		NA	NA	NA	NA	NA	NA	NA		NA	NA	NA	NA	NA	NA	NA		475.132	0.96893		471.988	0.962519
AURKAIP1	1	1271387	1271309	96.2	1	1737.64	2.03347	1226.42	1.43522		1	1284632	1284710	0.988	1	4042.06	4.73023		1	4450813	4450891	0.925	1	204.883	0.239765		270.966	0.317099		2840.99	3.32467
BOLA2B	16	31024565	31024482	97.62	1	501.474	0.371781	558.121	0.413778		16	30587964	30588047	1	1	534.986	0.396627		20	28170167	28170248	0.95	1	220.504	0.163477		536.137	0.39748		529.464	0.392533
BPY2	NA	NA	NA	NA	NA	NA	NA	NA	NA		Y, Y	11084897, 3116785	11084991, 3116879	97.90%, 97.90%	2	570.293	0.93167		NA	NA	NA	NA	NA	NA	NA		281.541	0.459944		2.18658	0.00357214
BTNL8	5, 5	165864903, 165860046	165864804, 165859947	99, 99	2	216.558	0.873955	357.336	1.44208		5	183450142	183450241	0.99	1	385.916	1.55742		NA	NA	NA	NA	NA	NA	NA		266.086	1.07383		289.565	1.16859
C16orf54	16	30568904	30568828	100	1	326.848	1.10692	613.469	2.0776		NA	NA	NA	NA	NA	NA	NA		20	27696959	27697035	0.923	1	277.408	0.939482		581.688	1.96997		379.527	1.28532
TMEM167B	1	112143621	112143523	98	1	432.542	0.702347	355.569	0.577361		NA	NA	NA	NA	NA	NA	NA		NA	NA	NA	NA	NA	NA	NA		166.037	0.269605		511.971	0.83132
C4B	6, 6	32982252, 32955791	32982173, 32955712	100, 100	2	496.878	1.33865	654.097	1.76222		6	32558491	32558570	0.988	1	644.828	1.73725		NA	NA	NA	NA	NA	NA	NA		580.061	1.56276		531.963	1.43317
C6orf124	NA	NA	NA	NA	NA	NA	NA	NA	NA		NA	NA	NA	NA	NA	NA	NA		4	164739019	164739118	0.95	1	334.313	0.721577		375.896	0.81133		292.064	0.630388
FAM203A	8	144626619	144626541	98.73	1	496.878	0.993787	2399.34	4.79882		8	144123927	144124005	0.988	1	2304.22	4.60858		8	146754807	146754884	0.945	1	490.52	0.981071		973.75	1.94756		364.533	0.729089
FAM75A1	9	40205900	40205824	100	1	1765.21	0.582455	456.845	0.150742		9_random, 9_random	3086703, 3326922	3086780, 3326999	100.00%, 98.80%	2	381.993	0.126044		NA	NA	NA	NA	NA	NA	NA		254.698	0.0840411		1686.47	0.556475
CBWD3	NA	NA	NA	NA	NA	NA	NA	NA	NA		2a, Un, 9, Un	114289156, 30483241, 175869, 8725566	114289251, 30483335, 175963, 8725660	100.00%, 100.00%, 99.00%, 99.00%	4	1484.33	0.840517		15	77026841	77026935	0.958	1	330.965	0.187413		339.293	0.192128		5197.49	2.94313
CCL3	5, 5	47962681, 48045675	47962750, 48045744	100, 98.57	2	864.51	1.46834	806.6	1.36998		17, 17, 17_random, 17_random	19412210, 21067511, 4494728, 4446081	19412278, 21067580, 4494797, 4446149	94.30%, 94.30%, 91.50%, 91.40%	4	809.59	1.37506		NA	NA	NA	NA	NA	NA	NA		1011.98	1.71881		576.944	0.979917
CCL4	5	48029705	48029787	95.18	1	795.579	0.796929	824.853	0.826252		17, 17	19428712, 21050753	19428794, 21050835	96.40%, 96.40%	2	864.51	0.865976		NA	NA	NA	NA	NA	NA	NA		228.669	0.229057		694.394	0.695571
CCR2	3	47651391	47651307	97.65	1	267.108	0.590561	476.276	1.05302		3	47398910	47398994	0.989	1	656.596	1.4517		2	90159853	90159937	0.906	1	413.532	0.914298		445.849	0.985748		496.977	1.09879
CCR5	3	47667230	47667131	97	1	469.306	0.931264	421.516	0.836434		3	47415045	47415144	0.97	1	405.53	0.804712		2	90143936	90144035	0.93	1	0.697356	0.0013838		333.599	0.661975		524.466	1.04072
CCRL2	3	47703546	47703447	99	1	414.161	0.917475	402.674	0.892029		3	47448062	47448161	0.99	1	338.841	0.750622		NA	NA	NA	NA	NA	NA	NA		411.686	0.911992		484.483	1.07326
CDY1B	NA	NA	NA	NA	NA	NA	NA	NA	NA		Y, Y, Y, Y, Y	1943310, 2105307, 12161620, 5620437, 12298239	1943385, 2105382, 12161695, 5620512, 12298314	100.00%, 100.00%, 98.70%, 98.70%, 98.70%	5	1809.93	1.50117		NA	NA	NA	NA	NA	NA	NA		572.741	0.475034		9.68341	0.00803146
CFC1	2b	17546269	17546174	97.92	1	354.421	0.512198	407.385	0.58874		2b	131435198	131435293	0.99	1	515.372	0.7448		NA	NA	NA	NA	NA	NA	NA		375.083	0.542058		394.521	0.570149
CKMT1A	15	22412687	22412588	95	1	666.908	0.855221	647.031	0.829732		15	40723297	40723396	0.97	1	613.444	0.786661		7	22032765	22032864	0.95	1	599.866	0.769248		772.839	0.991063		716.884	0.919309
CR1	1, 1, 1	187950804, 187933722, 187959298	187950716, 187933634, 187959210	97.75, 97.75, 96.63	3	607.168	0.84811	727.11	1.01565		1, 1_random, 1	187945456, 6901817, 187962777	187945544, 6901905, 187962865	98.90%, 98.90%, 97.80%	3	789.975	1.10346		1, 1, 1	162665337, 162803512, 162826495	162665425, 162803600, 162826583	95.60%, 95.00%, 92.20%	3	1019.4	1.42392		622.358	0.869329		546.956	0.764005
CRLF2	X	1091132	1091037	97.92	1	290.085	1.23912	364.99	1.55959		X_random	3520646	3520741	1	1	381.993	1.58809		NA	NA	NA	NA	NA	NA	NA		7.42234	0.0308586		347.041	1.48268
CSAG2	X, X	151062885, 151028915	151062964, 151028836	97.5, 97.5	2	800.175	1.04203	914.941	1.19182		X, X	152237024, 152224105	152237103, 152224184	97.50%, 95.00%	2	523.218	1.31108		X	150829797	150829876	0.913	1	0.649953	0.00130253		505.228	1.26618		1104.22	1.438
CSH	5, 5, 5, 5	19910850, 19901173, 19889380, 19892769	19910938, 19901260, 19889466, 19892856	95.51, 94.38, 94.38, 91.01	4	1057.52	1.15891	1094.53	1.19948		17, 17, 17	63147665, 63170457, 63155712	63147753, 63170545, 63155799	100.00%, 98.90%, 92.10%	3	1139.11	1.24834		16, 16, Ur	59467482, 59437031, 89727	59467569, 59437119, 89815	93.20%, 92.20%, 92.20%	3	412.416	0.45196		916.812	1.00472		1134.21	1.24296
CT45	NA	NA	NA	NA	NA	NA	NA	NA	NA		X, X, X	135264369, 135187632, 135189397	135264468, 135187731, 135189496	99.00%, 93.00%, 93.00%	3	491.834	0.490984		X, X	134007254, 133909022	134007355, 133909119	92.00%, 91.90%	2	384.522	0.198472		2.5419	0.00253751		749.371	0.386118
CT47 (probe 1)	X, X	118592907, 118582700	118592808, 118582601	97, 97	2	676.099	0.286004	206.011	0.0871551		X	120354151	120354250	0.98	1	40.7002	0.0332465		NA	NA	NA	NA	NA	NA	NA		0.101676	8.3056e-05		74.6559	0.0317312
CT47 (probe 2)	X, X, X	118592189, 118581982, 118558165	118592096, 118581889, 118558072	98.94, 98.94, 98.94	3	4458.12	1.17511	6009.94	1.58421		X, X, X	120346601, 120353439, 118566666	120346694, 120353532, 118566760	99.00%, 97.90%, 93.30%	3	856.665	0.435006		X, X, X	119095931, 119085432, 117329695	119096024, 119085525, 117329788	94.70%, 93.70%, 92.50%	3	1875.19	0.494241		762.264	0.387068		1494.06	0.393811
CTAG1B	X, X, X	152964125, 153040331, 153005227	152964205, 153040251, 153005147	100, 100, 100	3	1190.78	1.20357	1187.56	1.20054		X, X	153929098, 153964547	153929178, 153964627	100.00%, 98.80%	2	527.141	0.982398		X, X	152615974, 152653828	152616054, 152653908	95.10%, 95.10%	2	1506.99	1.52291		8.23575	0.0153491		964.28	0.974176
D2HGDH	2b	131491659	131491571	100	1	584.191	0.791998	771.271	1.04563		2b	248157425	248157513	1	1	766.438	1.03907		12	105660961	105661048	0.989	1	366.67	0.497101		637	0.863592		591.937	0.8025
DAZ1	NA	NA	NA	NA	NA	NA	NA	NA	NA		Y, Y, Y, Y	11217265, 3249116, 11334671, 3436084	11217364, 3249215, 11334770, 3436183	100.00%, 100.00%, 100.00%, 100.00%	4	1704.01	1.304		NA	NA	NA	NA	NA	NA	NA		678.484	0.51921		122.136	0.0934646
DEFA1	8	6886503	6886404	99	1	570.405	0.609563	589.917	0.630415		8, 8, 8	7038695, 7077516, 7042900	7038794, 7077615, 7043000	100.00%, 100.00%, 100.00%	3	1197.96	1.2802		8	7078326	7078425	0.99	1	262.903	0.280952		209.961	0.224375		976.775	1.04383
DEFB103A	8	7194725	7194636	94.44	1	487.687	0.407418	386.776	0.323116		8	7511527	7511616	0.934	1	79.9292	0.0667735		8	8059938	8060030	0.923	1	1.81313	0.0015147		1494.33	1.24838		7.18446	0.00600195
DEFB104A	8	7235579	7235490	97.78	1	322.253	0.556363	356.158	0.614899		8	7552646	7552735	0.967	1	1025.35	1.77025		8	8019358	8019447	0.945	1	428.037	0.738997		1408.11	2.43107		856.825	1.47929
DEFB105A	8	7497895	7497989	97.89	1	294.68	0.481016	310.231	0.5064		8	7571702	7571796	0.99	1	872.356	1.42398		NA	NA	NA	NA	NA	NA	NA		4.98212	0.00813248		854.326	1.39455
DEFB106A	8	7502889	7502981	97.85	1	363.611	0.527279	367.345	0.532694		8	7567244	7567336	0.99	1	1299.95	1.88508		8	8005342	8005434	0.904	1	332.081	0.481556		1622.85	2.35332		846.83	1.228
DEFB107A	NA	NA	NA	NA	NA	NA	NA	NA	NA		8, 8_random, Un	7579508, 3171531, 55228493	7579607, 3171630, 55228592	99.00%, 99.00%, 99.00%	3	1531.4	1.12783		8	7988823	7988921	0.93	1	5.16044	0.00380049		1681.41	1.23831		1374.11	1.01199
DEFB130	11	68912061	68912160	94	1	391.184	0.502408	523.97	0.672948		8, 8, 11, 4	7946903, 7944908, 70153004, 9197216	7947002, 7945007, 70153103, 9197314	96.30%, 96.00%, 94.00%, 93.00%	4	1092.04	1.40253		8	8725977	8726076	0.91	1	0.697356	0.000895633		2.5419	0.00326463		1281.65	1.64605
DGAT1	8	144866497	144866428	98.57	1	120.055	1.08116	102.38	0.921983		8	144312285	144312354	0.986	1	162.31	1.46169		8	146950371	146950440	0.972	1	106.695	0.960849		112.352	1.01179		99.6454	0.897359
DHRS4	14	5062942	5062852	97.8	1	1351.62	0.96412	1317.1	0.939494		14, 14	22894356, 22935497	22894446, 22935587	99.00%, 99.00%	2	907.662	0.64744		7, 7	86843803, 86928107	86843893, 86928197	96.80%, 93.50%	2	1644.23	1.17283		907.864	0.647584		1186.69	0.846469
DMRTC1	X, X	70262684, 70235055	70262777, 70234962	97.87, 97.87	2	850.724	0.982201	1036.24	1.19572		X	72169000	72169093	0.979	1	389.839	0.85491		X	71827775	71827868	0.947	1	794.01	0.916413		426.327	0.93487		864.322	0.997205
DTYMK	2b	131428253	131428178	100	1	129.246	0.766221	188.935	1.12008		2b	248094704	248094779	1	1	166.233	0.985498		12	105599225	105599300	0.961	1	143.516	0.85082		134.314	0.796267		177.113	1.05
DUX4	10, 4, unplaced32430, 12	148005778, 201587094, 2848, 17370083	148005847, 201587163, 2779, 17370014	97.14, 95.71, 94.29, 94.29	4	5735.64	0.218008	5857.43	0.222638		12, 18_random, 10_random, Un, 10_random, 4_random, Un, Un, Un, Un, Un, Un, Un, 3, 4_random, 10_random, 18_random, Un	17569040, 343367, 4400964, 50807963, 4436858, 4778301, 51864625, 23195828, 13478280, 57454874, 44670274, 14680857, 12453069, 77605001, 4763726, 4472011, 86361, 42724624	17569109, 343436, 4401033, 50808032, 4436927, 4778370, 51864694, 23195897, 13478349, 57454943, 44670343, 14680926, 12453138, 77605069, 4763794, 4472080, 86430, 42724693	95.80%, 95.80%, 94.30%, 94.30%, 92.90%, 92.90%, 92.90%, 92.90%, 92.90%, 92.90%, 92.90%, 92.90%, 92.90%, 92.80%, 92.80%, 91.50%, 91.50%, 91.50%	18	103135	3.92009		NA	NA	NA	NA	NA	NA	NA		5.79553	0.000220285		28202.8	1.07197
EIF3C	NA	NA	NA	NA	NA	NA	NA	NA	NA		16_random, 16_random, 16_random, 16_random	3646804, 3676587, 3677466, 3682161	3646893, 3676676, 3677555, 3682250	100.00%, 100.00%, 100.00%, 98.90%	4	1131.27	3.16941		20	27065664	27065753	0.956	1	151.326	0.423962		183.118	0.513032		704.39	1.97345
ELA	13	85173031	85173129	99	1	354.421	0.367921	576.963	0.59894		1	22147910	22148009	0.98	1	931.2	0.96667		NA	NA	NA	NA	NA	NA	NA		1025	1.06404		769.362	0.798668
F8A2	X, X	153847430, 153296246	153847512, 153296328	100, 100	2	933.442	0.939874	1173.43	1.18164		X	154681811	154681893	0.976	1	519.295	0.989686		NA	NA	NA	NA	NA	NA	NA		241.684	0.460607		1081.73	1.08997
FAM90A	8	7417137	7417048	100	1	21456.5	1.36301	18839.6	1.19677		8, 8, 8, 11, 12, 8_random, 8_random	7375190, 7398177, 7843291, 70050927, 8561139, 3193650, 3196095	7375279, 7398266, 7843380, 70051016, 8561228, 3193739, 3196184	98.90%, 97.80%, 97.80%, 96.70%, 96.70%, 95.60%, 95.60%	7	36998.4	2.3503		8	8636254	8636342	0.911	1	1654.27	0.105086		7302.87	0.463911		37241.4	2.36574
FAM21B	10	58906594	58906495	97	1	1264.31	0.931543	1898.85	1.39907		10, 10_random	46186388, 7930413	46186487, 7930512	100.00%, 98.00%	2	2100.23	1.54744		9	46242855	46242954	0.96	1	450.353	0.331819		681.737	0.502303		1291.64	0.95168
FAM23A	10	18473224	18473134	97.8	1	620.954	1.01685	596.982	0.977598		10	18408493	18408583	1	1	660.519	1.08164		NA	NA	NA	NA	NA	NA	NA		475.945	0.779392		556.952	0.912046
FAM72A	1	186497526	186497427	98	1	336.039	0.317549	357.336	0.337674		1	186588875	186588974	1	1	444.76	0.420288		1	164155413	164155512	0.96	1	271.829	0.256873		370.202	0.349833		362.034	0.342114
FAM75A5	9, 9, 9	40205657, 64205488, 75105691	40205746, 64205399, 75105780	100, 94.44, 92.22	3	1489.49	0.847973	1474.9	0.83967		9_random, 9_random, 9	3086536, 3326755, 81000417	3086625, 3326844, 81000506	98.90%, 97.80%, 93.40%	3	1201.88	0.684238		15, 15	110046830, 109497758	110046919, 109497847	95.60%, 92.30%	2	269.598	0.153484		3097.56	1.76346		1096.72	0.624371
FCGBP	19	37413966	37413891	100	1	804.77	1.21295	990.898	1.49348		19, 19	45445975, 45463339	45446050, 45463414	100.00%, 100.00%	2	801.744	1.20839		19, 19	46264833, 46248630	46264908, 46248705	97.40%, 96.10%	2	676.854	1.02016		369.389	0.556744		1046.75	1.57766
FCGR	1	141013658	141013571	98.86	1	1425.15	0.935496	1076.86	0.706875		1_random, 1	6264137, 140824232	6264224, 140824319	100.00%, 97.80%	2	1378.41	0.904816		NA	NA	NA	NA	NA	NA	NA		741.929	0.487017		1274.15	0.836376
FOXD4L2	9, 9	50040717, 50028393	50040808, 50028484	98.91, 96.74	2	2335.04	1.08172	2038.98	0.944574		9, 2a, 2b, Un, Un, 22	67050163, 114347752, 114108915, 19115847, 8800714, 50151894	67050254, 114347843, 114109006, 19115938, 8800805, 50151985	100.00%, 100.00%, 100.00%, 99.00%, 99.00%, 97.90%	6	2818.12	1.30551		NA	NA	NA	NA	NA	NA	NA		367.762	0.170368		1828.91	0.847258
FUSIP1	1	24852397	24852298	99	1	340.634	0.92955	379.711	1.03618		1	24186577	24186676	1	1	629.136	1.71684		1	26600246	26600344	0.95	1	520.646	1.42078		417.38	1.13898		456.994	1.24708
GAGE6	X, X, X, X	50349584, 50320905, 50387765, 50312712	50349485, 50320806, 50387666, 50312613	96, 96, 96, 96	4	23.5514	0.00639942	31.7223	0.00853257		X, X, X	49512237, 49521764, 49486799	49512336, 49521863, 49486897	96.00%, 96.00%, 94.00%	3	9.91216	0.0049634		X, X	47198857, 47245706	47198956, 47245805	91.00%, 91.00%	2	0.649953	0.000266643		3.35531	0.00168015		24.6771	0.00666607
SLX1B	16, 16	31027577, 30273423	31027498, 30273344	97.5, 97.5	2	110.864	0.317359	128.288	0.367236		16	30591235	30591314	0.975	1	127.004	0.363562		NA	NA	NA	NA	NA	NA	NA		22.8771	0.0654879		137.13	0.392547
GOLGA8G	15, 10, 15, 9	7314403, 33712318, 82134207, 112134703	7314502, 33712417, 82134305, 112134802	95, 95, 92, 92	4	4444.33	0.50574	3865.48	0.439871		15, 15, 15_random, 10, 15, 15, 15, 9, 15, 15	26049154, 26206313, 1505140, 31089063, 73112171, 20796267, 29380139, 128093993, 99847536, 29221662	26049253, 26206412, 1505239, 31089162, 73112270, 20796367, 29380238, 128094092, 99847634, 29221760	100.00%, 96.00%, 96.00%, 95.00%, 95.00%, 95.00%, 94.00%, 92.00%, 91.00%, 91.00%	10	6132.97	0.697899		7, 3, 7, 7, 7, 9, 15, 7	81895620, 95702655, 57791179, 79844807, 79902041, 30497159, 10614304, 61499165	81895719, 95702754, 57791277, 79844905, 79902140, 30497258, 10614403, 61499262	97.00%, 95.00%, 93.00%, 92.00%, 92.00%, 92.00%, 91.00%, 90.20%	8	5366.43	0.610671		9764.24	1.11112		4745.18	0.539976
GSTM	1	112797897	112797798	100	1	836.938	1.35987	1009.15	1.63968		1	128109878	128109977	0.99	1	687.98	1.11784		NA	NA	NA	NA	NA	NA	NA		53.7866	0.087393		696.893	1.13232
GSTT2	22	7865048	7864974	93.33	1	1328.65	2.24567	1148.7	1.94152		22_random	941028	941102	0.987	1	1033.2	1.7463		NA	NA	NA	NA	NA	NA	NA		399.485	0.675206		834.335	1.41019
GTPBP6	NA	NA	NA	NA	NA	NA	NA	NA	NA		X_random	3546017	3546104	0.966	1	401.608	1.18373		NA	NA	NA	NA	NA	NA	NA		337.666	0.995259		384.525	1.15657
GUSBP1	17, 17, 6	72536379, 27161038, 27766945	72536304, 27160963, 27766870	100, 98.68, 98.68	3	2950.82	0.465722	2564.79	0.404796		5, 5, 6, Un, 5, 6	86437881, 45737499, 27360059, 1482491, 94523095, 59646621	86437956, 45737574, 27360134, 1482566, 94523170, 59646696	100.00%, 100.00%, 100.00%, 100.00%, 98.70%, 98.70%	6	5262.09	0.830504		3	59000504	59000578	0.907	1	144.632	0.0228269		36.705	0.00579307		4417.82	0.697255
H2AFB1	NA	NA	NA	NA	NA	NA	NA	NA	NA		X	154818664	154818746	0.964	1	727.209	1.09286		NA	NA	NA	NA	NA	NA	NA		448.289	0.673697		1004.26	0.817566
HGD	3	120444640	120444562	100	1	257.917	0.674292	469.799	1.22823		3	124939058	124939137	1	1	401.608	1.04995		NA	NA	NA	NA	NA	NA	NA		352.307	0.921063		342.043	0.894229
HIST2	1, 1	128983310, 128969457	128983390, 128969377	98.77, 98.77	2	1245.93	0.987508	1271.17	1.00752		1	128859775	128859855	0.988	1	1429.41	1.13293		NA	NA	NA	NA	NA	NA	NA		1164.9	0.923286		1099.22	0.87123
HP	16	62468419	62468328	95.65	1	717.458	1.25228	850.172	1.48392		16	71940381	71940472	0.99	1	1017.5	1.77599		NA	NA	NA	NA	NA	NA	NA		539.391	0.941475		706.889	1.23383
HRNR	1	131472474	131472395	97.5	1	2541.83	0.714893	2488.25	0.699823		1, 1, 1, 1, 1, 1, 1, 1, 1	131294080, 131303242, 131301838, 131299015, 131296903, 131294788, 131300422, 131297611, 131301130	131294159, 131303321, 131301917, 131299094, 131296982, 131294867, 131300501, 131297690, 131301209	100.00%, 98.80%, 98.80%, 98.80%, 97.50%, 95.00%, 93.80%, 93.80%, 92.50%	9	4485.35	1.26151		1, 1, 1, 1, 1	130723806, 130723326, 130722093, 130716994, 130715282	130723885, 130723405, 130722172, 130717073, 130715361	91.30%, 91.30%, 91.30%, 91.30%, 91.30%	5	2343.81	0.6592		2551.76	0.717686		3310.79	0.931163
HSFY2	NA	NA	NA	NA	NA	0.574426	0.00168745	3.45927	0.0101621		NA	NA	NA	NA	NA	40.7002	0.119562		NA	NA	NA	NA	NA	0.697356	0.00204857		4.16871	0.0122461		0.310255	0.000911415
KIF22	16	30614459	30614360	97	1	225.749	0.708338	313.175	0.982655		16	30164943	30165042	0.97	1	413.376	1.29706		20	27740779	27740878	0.93	1	219.388	0.688379		256.325	0.804277		309.557	0.971303
KIR2DL2	19, 19, 19	52417696, 52483526, 52517686	52417604, 52483434, 52517594	97.85, 91.4, 91.4	3	685.29	0.652278	1892.37	1.80121		Un, 19, 19_random, 19_random, 19, 19	47111237, 60514353, 2102886, 2092777, 60496353, 60573323	47111329, 60514445, 2102978, 2092867, 60496445, 60573415	100.00%, 97.90%, 96.80%, 96.80%, 94.70%, 91.40%	6	2688.66	2.55914		NA	NA	NA	NA	NA	NA	NA		562.166	0.535086		846.83	0.806036
KIR2DL4	19	52468355	52468280	96.05	1	161.414	0.881865	240.162	1.3121		19	60542315	60542390	0.987	1	256.46	1.40114		NA	NA	NA	NA	NA	NA	NA		244.937	1.33819		229.59	1.25434
KIR2DL5A	19, 19, 19, 19, 19	52425280, 52405358, 52477956, 52423767, 52525200	52425203, 52405281, 52477879, 52423690, 52525126	98.72, 97.44, 96.15, 94.87, 92.31	5	1342.43	0.573952	3382.07	1.44599		19, 19, 19, 19, 19_random, 19, 19_random, 19_random	60475413, 60503777, 60520363, 60567626, 2110137, 60462139, 2098098, 484115	60475490, 60503854, 60520440, 60567703, 2110214, 60462216, 2098175, 484192	96.20%, 96.20%, 96.20%, 96.20%, 96.20%, 94.90%, 94.90%, 94.90%	8	3563.47	1.52355		19, 19	60865096, 60878899	60865172, 60878975	93.60%, 92.30%	2	3558.89	1.52159		946.908	0.404847		2108.8	0.901608
KIR2DS2	19	52414511	52414412	93	1	450.924	0.313618	1304.15	0.907034		19, 19_random, 19_random, Un, 19, 19, 19_random	60494971, 2091251, 2101505, 47109886, 60512967, 60571960, 489273	60495070, 2091350, 2101604, 47109985, 60513066, 60572059, 489372	99.00%, 99.00%, 98.00%, 98.00%, 97.00%, 93.00%, 93.00%	7	2743.58	1.90816		NA	NA	NA	NA	NA	NA	NA		621.545	0.432285		1196.68	0.832292
KIR3DP1	19	52452808	52452715	97.87	1	460.115	0.89051	589.917	1.14173		19	60531573	60531666	0.99	1	456.528	0.883569		NA	NA	NA	NA	NA	NA	NA		7.42234	0.0143653		504.474	0.976364
KLRC2	12, 12	10504620, 10489176	10504541, 10489097	97.5, 97.5	2	400.375	0.592558	442.125	0.654349		12, 12, 12	10759245, 10725714, 10742189	10759324, 10725793, 10742268	98.80%, 96.30%, 96.30%	3	1107.73	1.63945		11	10636454	10636533	0.913	1	12.9708	0.0191969		296.182	0.438352		771.861	1.14236
KPNA2	5	15533138	15533237	98	1	381.993	0.623779	591.094	0.965232		17	67280472	67280571	0.98	1	625.213	1.02095		NA	NA	NA	NA	NA	NA	NA		807.815	1.31913		526.965	0.860512
KRT39	5	43232023	43232122	98	1	423.352	0.994813	414.45	0.973896		17	16551075	16551174	0.99	1	421.222	0.989808		NA	NA	NA	NA	NA	NA	NA		435.275	1.02283		479.485	1.12672
KRT40	5	43208010	43208104	98.95	1	423.352	0.745529	513.371	0.904054		17	16527877	16527971	1	1	633.059	1.11483		NA	NA	NA	NA	NA	NA	NA		557.286	0.981389		554.453	0.976401
KRTAP1-1	5	43089499	43089598	98	1	901.274	1.5603	1083.34	1.8755		17	16409065	16409164	0.98	1	738.977	1.27933		NA	NA	NA	NA	NA	NA	NA		333.599	0.577532		754.369	1.30598
KRTAP2-1	NA	NA	NA	NA	NA	NA	NA	NA	NA		17	16503413	16503512	0.99	1	738.977	1.22488		NA	NA	NA	NA	NA	NA	NA		584.942	0.969558		569.447	0.943875
KRTAP3-1	5, 5, 5	42927452, 42921733, 42907305	42927551, 42921831, 42907401	99, 94.95, 90.82	3	538.237	0.44688	889.622	0.738624		17, 17, 17, 17_random	16298901, 16292743, 16281504, 4484830	16299000, 16292842, 16281601, 4484929	99.00%, 95.00%, 93.90%, 93.90%	4	1092.04	0.906684		16, 16	51369782, 51349601	51369881, 51349699	95.00%, 92.00%	2	444.774	0.369281		1169.78	0.971231		1474.06	1.22387
KRTAP4-1	5, 5, 5, 5, 5	42916005, 42908638, 42928790, 42923026, 42890341	42916094, 42908727, 42928877, 42923115, 42890430	98.89, 98.89, 97.73, 95.56, 93.33	5	1852.52	1.01377	2026.62	1.10904		17_random, 17, 17, 17, 17, 17	4490437, 16288526, 16294214, 16266885, 16262501, 16257590	4490526, 16288615, 16294303, 16266974, 16262590, 16257677	98.90%, 97.80%, 95.60%, 94.50%, 93.40%, 91.00%	6	1711.86	0.936792		16, 16	51348079, 51385601	51348168, 51385690	96.70%, 96.70%	2	1858.45	1.01701		1736.73	0.950401		2311.21	1.26478
KRTAP5-1	5	43166313	43166412	98	1	529.046	0.76351	612.88	0.884499		17	16487275	16487374	0.97	1	691.903	0.998542		NA	NA	NA	NA	NA	NA	NA		4.16871	0.00601622		539.459	0.778539
KRTAP7-1	5	43129354	43129433	100	1	597.977	0.963307	609.347	0.981624		17	16450893	16450972	1	1	656.596	1.05774		NA	NA	NA	NA	NA	NA	NA		582.501	0.938376		324.55	0.522832
KRTAP8-1	5	43192807	43192898	97.83	1	446.329	0.875494	505.716	0.991986		17	16514594	16514685	0.99	1	460.451	0.903196		NA	NA	NA	NA	NA	NA	NA		410.872	0.805945		409.514	0.803281
KRTAP9-1	5	43104365	43104276	98.89	1	1071.3	2.76706	1055.08	2.72516		NA	NA	NA	NA	NA	NA	NA		NA	NA	NA	NA	NA	NA	NA		3.35531	0.0086664		916.8	2.368
LCE2	1	131930624	131930525	96	1	1154.02	0.861216	1446.64	1.07959		1, 1, 1	131779960, 131755406, 131784418	131780059, 131755505, 131784517	99.00%, 97.00%, 95.00%	3	1370.57	1.02282		1, 1, 1	131180265, 131202091, 131191318	131180364, 131202190, 131191417	95.00%, 95.00%, 94.00%	3	1332.93	0.994729		1018.49	0.760071		1331.62	0.993757
LIMS3	2a, 2a	108450598, 107970301	108450697, 107970202	100, 100	2	1016.16	0.759782	1145.76	0.856682		2a, 2a	111182736, 109905897	111182835, 109905996	100.00%, 100.00%	2	1135.19	0.848783		13	108438882	108438981	0.96	1	233.893	0.174882		490.586	0.366812		899.307	0.672412
LOC23117	18, 16, 16	11870065, 29264169, 22066022	11869978, 29264082, 22065934	98.86, 98.86, 96.63	3	1949.03	0.342428	2398.75	0.421441		16, 16_random, 16_random, 16_random, 16, 18, 16_random, 16_random, 16_random, 16_random, 16_random, 16_random, Un	28808837, 3041957, 3744403, 3192368, 21678053, 4911867, 3722405, 2452593, 5959266, 2477293, 3543035, 2497657, 34209777	28808924, 3042044, 3744490, 3192456, 21678140, 4911954, 3722492, 2452681, 5959353, 2477380, 3543122, 2497745, 34209864	100.00%, 100.00%, 100.00%, 100.00%, 98.90%, 98.90%, 98.90%, 98.90%, 97.80%, 97.80%, 97.80%, 97.80%, 97.80%	13	6972.48	1.22501		NA	NA	NA	NA	NA	NA	NA		2764.87	0.485766		5222.48	0.917548
CLEC18A	16, 16	64899335, 60303252	64899434, 60303153	98, 96	2	1034.54	1.29212	1049.19	1.31041		16, 16_random	74333649, 5973552	74333748, 5973651	100.00%, 100.00%	2	1072.42	1.33943		20	72452619	72452718	0.96	1	247.282	0.30885		270.966	0.33843		836.834	1.04518
LOC389852	X	49044060	49043966	100	1	257.917	0.440998	344.971	0.589707		NA	NA	NA	NA	NA	NA	NA		X	45827618	45827712	0.979	1	343.239	0.586289		140.008	0.437525		277.07	0.473475
CDC37P1	16	29603864	29603943	98.75	1	280.894	0.800302	382.655	1.09023		16	28866359	28866438	0.988	1	707.594	2.01602		NA	NA	NA	NA	NA	NA	NA		167.664	0.477694		666.906	1.9001
GOLGA6L9	15, unplaced17491, 15, 10, 15, 9	62355745, 5547, 70292506, 33710431, 52286879, 112129452	62355829, 5463, 70292423, 33710513, 52286795, 112129536	100, 98.82, 94.12, 91.76, 90.59, 90.59	6	5188.79	0.697038	5317.49	0.714328		15, 15, 15_random, 15_random, 15_random, Y, Un, 9, 15, 15	82120049, 82137973, 2955770, 3014127, 2689147, 5756808, 1329418, 128089172, 88044524, 26048088	82120133, 82138057, 2955854, 3014211, 2689231, 5756892, 1329502, 128089256, 88044607, 26048172	100.00%, 100.00%, 100.00%, 100.00%, 100.00%, 98.90%, 98.90%, 91.80%, 91.70%, 90.60%	10	7949.28	1.06787		7, 7, 7, 7, 7, 7, 7, 7, 7, 7, 15, 10	69992186, 40623237, 9175957, 10640755, 79846383, 79903632, 51258660, 2537108, 81894114, 12751851, 10619085, 86764872	69992270, 40623322, 9176041, 10640839, 79846467, 79903716, 51258744, 2537192, 81894198, 12751936, 10619169, 86764955	97.70%, 97.30%, 94.20%, 94.20%, 91.80%, 91.80%, 91.80%, 91.80%, 91.80%, 90.60%, 90.60%, 90.40%	12	7731.87	1.03866		9752.04	1.31005		5792.24	0.778103
LOC653606	1, 1, 1, 1	13522156, 13340186, 13878437, 13697173	13522246, 13340097, 13878529, 13697265	100, 97.8, 96.77, 96.77	4	1687.09	1.29726	1851.15	1.42342		1, 1_random, 1_random, Un	13503149, 4472101, 4514203, 36749888	13503239, 4472191, 4514293, 36749978	99.00%, 99.00%, 99.00%, 99.00%	4	3410.48	2.62244		NA	NA	NA	NA	NA	NA	NA		458.863	0.352837		2853.48	2.19415
LOC727800	9	121232191	121232109	100	1	156.818	1.00294	170.093	1.08784		NA	NA	NA	NA	NA	NA	NA		15	1022392	1022474	0.988	1	88.8432	0.5682		66.8011	0.427229		192.106	1.22862
TSPY4	NA	NA	NA	NA	NA	NA	NA	NA	NA		Y, Y, Y, Y, Y, Y, Y, Y, Y, Y, Y, Y, Y	13617079, 9976631, 9933602, 9944456, 14090765, 4291005, 8105712, 8841672, 9574263, 14444794, 7752978, 8488847, 9221495	13617147, 9976699, 9933671, 9944525, 14090833, 4291073, 8105781, 8841741, 9574332, 14444863, 7753047, 8488916, 9221564	98.60%, 98.60%, 97.20%, 97.20%, 97.20%, 97.20%, 91.50%, 91.50%, 91.50%, 91.50%, 91.50%, 91.50%, 91.50%	13	6544.88	0.900201		NA	NA	NA	NA	NA	NA	NA		7424.07	1.02113		14.6813	0.00201931
GTF2H2C	17	26469731	26469632	97	1	345.23	0.247108	523.97	0.375046		5	45999749	45999848	0.97	1	652.674	0.467169		NA	NA	NA	NA	NA	NA	NA		528.817	0.378515		364.533	0.260925
LOC728932	NA	NA	NA	NA	NA	NA	NA	NA	NA		1	113549024	113549123	0.99	1	687.98	0.56697		1	125854149	125854248	0.94	1	478.247	0.394127		629.679	0.518924		569.447	0.469286
TRIM49L1	11	87422334	87422433	99	1	1549.23	1.99328	1672.15	2.15145		11, 11, 11_random, 11_random, 11_random, 11_random, Un	88542655, 88549083, 8166565, 8174531, 3167867, 8110041, 58179210	88542754, 88549182, 8166664, 8174630, 3167966, 8110140, 58179308	99.00%, 99.00%, 99.00%, 99.00%, 97.00%, 96.00%, 93.00%	7	2586.67	3.32809		14	88518444	88518543	0.927	1	0.649953	0.00083625		2800.66	3.60342		1941.37	2.49782
LPA	6, 6, 6, 6, 6, 6, 6	162139240, 162140101, 162161023, 162182008, 162182869, 162183612, 162140844	162139161, 162140022, 162160944, 162181929, 162182790, 162183533, 162140765	100, 100, 100, 100, 100, 98.75, 98.75	7	5156.62	1.38098	4898.85	1.31195		6, 6, 6, 6, 6	163643105, 163607396, 163612941, 163637338, 163605125	163643184, 163607475, 163613020, 163637417, 163605204	100.00%, 98.80%, 98.80%, 98.80%, 98.80%	5	4414.74	1.1823		NA	NA	NA	NA	NA	NA	NA		170.104	0.0455552		4192.92	1.1229
MSat1	2a, 2a, 2a, 2a, 2a, 2a, 2a, 2a, 2a, 2a	93579020, 95121583, 93580890, 93584977, 94871311, 93589073, 95115224, 93602168, 95127212, 95113350	93578921, 95121484, 93580791, 93584878, 94871410, 93588974, 95115125, 93602069, 95127113, 95113251	97, 96, 93, 93, 93, 93, 92, 92, 92, 91	10	2858.92	0.70007	2617.79	0.641024		2a, 2a, 2a, 2a, 2a, 2a, 2a, 2a, 2a, 16, 2a, 2a, 2a	96831661, 96826057, 96821140, 96816886, 96814082, 96844758, 98158259, 96809242, 89834504, 34012582, 98432393, 96829793, 98443636	96831760, 96826156, 96821239, 96816985, 96814181, 96844857, 98158358, 96809341, 89834603, 34012681, 98432492, 96829892, 98443735	100.00%, 100.00%, 100.00%, 97.00%, 97.00%, 94.00%, 94.00%, 93.00%, 93.00%, 92.00%, 92.00%, 92.00%, 91.00%	13	4752.11	1.16366		NA	NA	NA	NA	NA	NA	NA		3.35531	0.000821622		2043.82	0.500476
MSat2	2a, 2a, 2a, 2a, 2a, 2a, 2a, 2a	93582072, 93579838, 95122400, 93585836, 95126166, 94872361, 95116289, 95118661	93582159, 93579925, 95122487, 93585923, 95126253, 94872274, 95116376, 95118748	97.73, 97.73, 97.73, 94.32, 94.32, 93.18, 92.05, 90.91	8	6342.23	0.346861	9896.1	0.541225		2a, 2a, 2a, 2a, 2a, 2a, 2a, 2a, 2a, 2a, 2a, 2a, 2a, 2a, 16, 2a, 2a	96826968, 96822052, 96810163, 96814999, 96832585, 96825103, 98159218, 98431445, 96830714, 96813135, 98433311, 98435185, 98427699, 96828838, 34011627, 96840097, 96806416	96827055, 96822139, 96810250, 96815086, 96832672, 96825190, 98159305, 98431532, 96830801, 96813222, 98433399, 98435272, 98427786, 96828926, 34011714, 96840184, 96806503	100.00%, 100.00%, 100.00%, 98.90%, 97.80%, 97.80%, 95.50%, 95.50%, 95.50%, 95.50%, 95.20%, 94.40%, 94.40%, 94.00%, 93.20%, 92.10%, 92.10%	17	13802.3	0.754855		13, 2, 13, 13, 13	112857921, 130285942, 112806460, 112891041, 112861674	112858008, 130286027, 112806547, 112891128, 112861761	94.40%, 93.70%, 92.70%, 92.10%, 91.00%	5	1731.26	0.0946836		16.3698	0.000895277		10282.8	0.562376
MSat5	4, 4, 4, 4, 4, 4, 4, 4, 4, 4, 4, 4, 1, 4, 4, 4, 4, 4, 4, 4, 4, 4, 4, 4, 4, 4, 4, 4, 4, 4, 4, 4, 4, 1	59931617, 59934121, 59935237, 59944436, 59945987, 59995578, 59798802, 59843203, 59859551, 59866908, 59893637, 59910163, 124045137, 59939697, 59837512, 59936520, 59941021, 59842720, 59907996, 59851637, 59912871, 59933132, 59942999, 60024611, 60006839, 59911733, 59903228, 59898291, 59882698, 59884455, 59845346, 59970927, 59941791, 124046174	59931692, 59934196, 59935312, 59944511, 59946062, 59995653, 59798727, 59843128, 59859476, 59866833, 59893562, 59910088, 124045062, 59939772, 59837437, 59936595, 59941096, 59842645, 59907921, 59851562, 59912946, 59933207, 59943074, 60024686, 60006914, 59911658, 59903153, 59898216, 59882623, 59884380, 59845271, 59971004, 59941866, 124046099	97.37, 97.37, 97.37, 97.37, 97.37, 97.37, 97.37, 97.37, 97.37, 97.37, 97.37, 97.37, 97.37, 96.05, 96.05, 96.05, 96.05, 96.05, 96.05, 96.05, 94.74, 94.74, 94.74, 94.74, 94.74, 94.74, 94.74, 94.74, 94.74, 94.74, 94.74, 93.59, 93.42, 93.42	34	99215.4	3.25409	49035.1	1.60826		2b, 4_random, 4_random, 4_random, 4_random, 4_random, 4_random, 4_random, 4_random, 4_random, 4_random, 4_random, 4_random, Un, Un, Un, Un, Un, Un, Un, Un, Un, Un, Un, Un, Un, Un, 4, 4, 4_random, 4_random, 4_random, 4_random, Un, Un, Un, Un, Un, 4_random, 4_random, Un, Un, Un, 4_random, 4_random, Un	165981503, 5277512, 5301723, 5310206, 2803053, 3141574, 3141935, 5376864, 5389955, 5426608, 5455287, 5537796, 3410563, 58431301, 55359631, 53964887, 44389043, 22040291, 20489097, 12998860, 13599688, 58474719, 53517282, 36393199, 25124033, 21543896, 16618750, 82615736, 82619561, 5344502, 5348424, 2820837, 3240753, 57829723, 45846073, 37551084, 58403511, 51676068, 2743206, 5553617, 50084950, 162752…	165981578, 5277587, 5301798, 5310281, 2803128, 3141649, 3142010, 5376939, 5390030, 5426683, 5455362, 5537871, 3410638, 58431376, 55359706, 53964962, 44389118, 22040366, 20489172, 12998935, 13599763, 58474794, 53517357, 36393274, 25124108, 21543971, 16618825, 82615811, 82619636, 5344577, 5348499, 2820912, 3240828, 57829798, 45846148, 37551159, 58403586, 51676143, 2743281, 5553692, 50085025, 162753…	97.40%, 97.40%, 97.40%, 97.40%, 97.40%, 97.40%, 97.40%, 97.40%, 97.40%, 97.40%, 97.40%, 97.40%, 97.40%, 97.40%, 97.40%, 97.40%, 97.40%, 97.40%, 97.40%, 97.40%, 97.40%, 97.40%, 97.40%, 97.40%, 97.40%, 97.40%, 97.40%, 96.10%, 96.10%, 96.10%, 96.10%, 96.10%, 96.10%, 96.10%, 96.10%, 96.10%, 96.10%, 96.10%, 94.80%, 94.80%, 94.80%, 94.80%, 94.60%, 94.50%, 93.40%, 92.00%	46	201243	6.60041		NA	NA	NA	NA	NA	NA	NA		253.071	0.0083003		173199	5.68063
MSat6	17, 17, 17, 17, 17, 17, 17, 17, 17, 17	76397424, 76400017, 76401326, 76451540, 76453048, 76398788, 76432652, 76435616, 76503078, 76378401	76397498, 76400091, 76401400, 76451614, 76453122, 76398864, 76432726, 76435690, 76503152, 76378475	97.33, 97.33, 97.33, 97.33, 97.33, 94.81, 94.67, 93.33, 93.33, 93.33	10	7821.95	1.01776	4348.9	0.565862		5, 5, 5, 5, 5, 5, 5	17870902, 17843151, 17918549, 17945840, 17952052, 17831120, 17883636	17870976, 17843225, 17918623, 17945914, 17952126, 17831194, 17883710	96.00%, 94.70%, 94.70%, 94.70%, 93.40%, 92.00%, 90.70%	7	5811.3	0.756144		6, 6	17679051, 17702396	17679125, 17702470	94.70%, 92.00%	2	298.608	0.0388538		3139.04	0.40844		8381.14	1.09052
MSat7	7, 5, 7	58075164, 166217457, 58068930	58075233, 166217388, 58068861	98.57, 97.14, 92.86	3	87.8871	0.00926925	99.4357	0.0104873		7, 7_random, 7_random, 7_random	63431808, 3607678, 3620480, 3629317	63431877, 3607747, 3620549, 3629385	97.20%, 94.30%, 94.30%, 91.40%	4	79.9292	0.00842995		NA	NA	NA	NA	NA	NA	NA		0.101676	1.07235e-05		79.6538	0.00840091
MSat8	7, 3, 3, 3, 3, 7, 13, 5, 3, 7, 3, 3, 5, 2b, X, 8, 9, 9, 3, 13, 5, 9, 9, 9, 12, 2a, 2a, 3, 7, 7, 13, 13, 13, 13, 13, 13, 2b, X, 8, 8, 8, 12, 12, 11, 13, 11, 11, 11, 4, 10	153057699, 8986632, 8981216, 125653070, 8983034, 153054712, 46415876, 56216242, 8982653, 153056150, 125627520, 8985231, 56217729, 46506986, 90758172, 7014266, 119450300, 112024190, 130233870, 46321527, 56221954, 48665998, 50066250, 50065232, 31605683, 72483945, 111569090, 8975709, 6987411, 6978870, 27609060, 28700585, 27577834, 27606629, 27608037, 46329938, 120894038, 90755154, 30881266, 6967084,…	153057784, 8986716, 8981301, 125653155, 8983119, 153054797, 46415961, 56216327, 8982737, 153056236, 125627605, 8985316, 56217814, 46507071, 90758257, 7014181, 119450215, 112024106, 130233786, 46321442, 56222039, 48666083, 50066165, 50065147, 31605768, 72484030, 111569005, 8975794, 6987326, 6978785, 27608975, 28700670, 27577749, 27606544, 27607952, 46329853, 120894123, 90755239, 30881351, 6967169,…	96.51, 96.47, 95.35, 95.35, 95.35, 95.35, 95.35, 95.35, 95.29, 94.25, 94.19, 94.19, 94.19, 94.19, 94.19, 94.19, 94.19, 94.19, 93.02, 93.02, 93.02, 93.02, 93.02, 93.02, 93.02, 93.02, 93.02, 91.86, 91.86, 91.86, 91.86, 91.86, 91.86, 91.86, 91.86, 91.86, 91.86, 91.86, 91.86, 91.86, 91.86, 91.86, 91.86, 91.86, 90.7, 90.7, 90.7, 90.7, 90.7, 90.7	50	29599.6	1.6818	25953.6	1.47464		7, 7, 7, 7, 3, 3, 3, 9, 9, 9, 9, 9, 13_random, 13_random, 13_random, 3_random, 9_random, 9_random, 9_random, Un, Un, Un, Un, Un, 3, 7, 9, 12, 13, 13, 13, 13, 2b, 2b, 8_random, 9_random, Un, Un, Un, Un, Un, 3, 7, 8, 8, 8, 10, 11, 12, 12, 13, 17, 10_random, 13_random, 13_random, 13_random, 9_random, 9_random, X, Un, Un, Un, 3, 4, 8, 8, 8, 8, 8, 11, 12, 13, 2a, 8_random, 8_random, Un, 13, 3, 4, 4, 7…	150597639, 154708622, 150596416, 150594517, 134499440, 8937564, 8939471, 135590707, 67076512, 67080524, 89409274, 67082636, 8971577, 8979033, 8983448, 3446598, 6812696, 6816879, 6355580, 52754150, 23669538, 13081469, 1608936, 1613614, 130081793, 6987875, 127963426, 9688701, 45227841, 81122503, 81125618, 46319838, 237623957, 163495446, 7189152, 5813461, 15770162, 3350154, 3354222, 3194121, 1256101…	150597724, 154708707, 150596501, 150594602, 134499525, 8937649, 8939556, 135590792, 67076597, 67080609, 89409359, 67082722, 8971662, 8979119, 8983534, 3446683, 6812781, 6816964, 6355665, 52754235, 23669623, 13081554, 1609021, 1613699, 130081878, 6987960, 127963511, 9688786, 45227926, 81122588, 81125703, 46319923, 237624042, 163495531, 7189237, 5813546, 15770247, 3350239, 3354307, 3194206, 1256186…	98.90%, 98.90%, 97.70%, 96.60%, 95.40%, 95.40%, 95.40%, 95.40%, 95.40%, 95.40%, 95.40%, 95.40%, 95.40%, 95.40%, 95.40%, 95.40%, 95.40%, 95.40%, 95.40%, 95.40%, 95.40%, 95.40%, 95.40%, 95.40%, 94.20%, 94.20%, 94.20%, 94.20%, 94.20%, 94.20%, 94.20%, 94.20%, 94.20%, 94.20%, 94.20%, 94.20%, 94.20%, 94.20%, 94.20%, 94.20%, 94.20%, 93.10%, 93.10%, 93.10%, 93.10%, 93.10%, 93.10%, 93.10%, 93.10%, 93.10%,…	91	38983.4	2.21497		3, 9, 6, 17, 18, 19, 19, 16, 8	33142128, 65680425, 141138009, 93497477, 47283532, 19679916, 11634906, 36847601, 36343333	33142213, 65680510, 141138094, 93497562, 47283617, 19680001, 11634991, 36847686, 36343418	94.20%, 93.10%, 91.90%, 91.90%, 91.90%, 91.90%, 91.30%, 90.70%, 90.60%	9	940.176	0.0534191		2406.16	0.136714		60646.6	3.44583
MSat9	8, 8, 8, 8, 8	7408540, 7416190, 7422721, 7407631, 7059661	7408616, 7416266, 7422797, 7407707, 7059737	96.1, 96.1, 94.81, 94.81, 93.51	5	13984.4	1.0349	14359.9	1.06269		8_random, 8, 8_random, 11, 12	3194882, 7844512, 3192440, 70052148, 8559931	3194958, 7844588, 3192515, 70052224, 8560007	97.50%, 94.90%, 94.80%, 92.30%, 92.30%	5	30757.1	2.27614		NA	NA	NA	NA	NA	NA	NA		11170.6	0.82667		28640.1	2.11948
MSat10	NA	NA	NA	NA	NA	5092.28	2.68694	6423.87	3.38955		NA	NA	NA	NA	NA	8969.24	4.73261		NA	NA	NA	NA	NA	507.257	0.267654		1319.45	0.696206		7026.72	3.70764
MSat11	21, 13	2141548, 261776	2141449, 261677	99, 99	2	1314.86	0.0973019	1633.88	0.12091		9, 21, 21, 21, Un, Un, 13_random, 18_random, 4	44964187, 13998186, 14017516, 13969883, 23452638, 22073294, 1302214, 1068982, 82338093	44964286, 13998285, 14017615, 13969983, 23452737, 22073393, 1302313, 1069081, 82338192	100.00%, 100.00%, 99.00%, 99.00%, 98.00%, 98.00%, 97.00%, 97.00%, 96.00%	9	19239.4	1.42375		NA	NA	NA	NA	NA	NA	NA		1559.4	0.115399		10542.7	0.78018
MSat12	19, 19, 16	8971204, 9009013, 29128938	8971123, 9008932, 29128857	96.34, 96.34, 96.34	3	23285.5	1.99022	18488.6	1.58023		19	9032624	9032705	0.976	1	41121.4	3.51466		19	8702491	8702572	0.927	1	924.555	0.0790221		16703.4	1.42765		26568.5	2.27082
MSat13	19, 19, 19, 19, 19, 19, 19, 19, 19, 19, 19, 19, 4, 19, 19, 19, 19, 19, 19, 19, 19, 4, 4, 4, 4, 4, 19, 19, 4, 4	34751650, 34749144, 33707269, 34739277, 33714879, 34858726, 34740307, 33712337, 33709792, 34728974, 34754169, 34706323, 141999533, 34746632, 34723957, 34731476, 34733978, 33697727, 33717404, 34744089, 34709393, 142000097, 142234027, 142233218, 142011302, 142003214, 34726472, 34705353, 142230785, 142484730	34751727, 34749221, 33707193, 34739354, 33714802, 34858649, 34740383, 33712261, 33709716, 34729051, 34754246, 34706399, 141999456, 34746709, 34724034, 34731553, 34734055, 33697650, 33717328, 34744165, 34709469, 142000020, 142234104, 142233295, 142011225, 142003137, 34726549, 34705429, 142230862, 142484807	98.72, 97.44, 97.4, 96.15, 96.15, 96.15, 96.15, 96.15, 96.15, 94.87, 94.87, 94.87, 94.87, 93.59, 93.59, 93.59, 93.59, 93.59, 93.59, 93.59, 93.59, 93.59, 93.59, 93.59, 93.59, 93.59, 92.31, 92.31, 92.31, 92.31	30	119306	2.56682	68158.5	1.4664		19, 4, 4, 4, 19, 19, 19_random, 4_random	42779973, 135289979, 135304915, 135322330, 43339478, 43343821, 1833450, 3984281	42780050, 135290056, 135304992, 135322407, 43339555, 43343898, 1833527, 3984358	98.80%, 94.90%, 94.90%, 94.90%, 93.60%, 93.60%, 93.60%, 93.60%	8	37794.8	0.813137		NA	NA	NA	NA	NA	NA	NA		24.5039	0.00052719		51455.4	1.10704
MSat14	19, 19, 19, 19, 19, 19, 19, 19, 19, 19, 19, 19, 19, 4, 19, 19, 19, 4, 4, 10	34739302, 34754194, 34751675, 34749169, 34705377, 34709417, 34744113, 33714854, 33712313, 33717380, 34740331, 34706347, 33709768, 141999509, 34738324, 34734002, 34726496, 142234051, 142233242, 104826890	34739226, 34754118, 34751599, 34749093, 34705302, 34709342, 34744038, 33714930, 33712388, 33717455, 34740256, 34706272, 33709843, 141999584, 34738249, 34733927, 34726421, 142233976, 142233167, 104826815	96.1, 96.1, 94.81, 94.81, 94.81, 94.81, 94.81, 93.51, 93.51, 93.51, 93.51, 93.51, 92.21, 92.11, 90.79, 90.79, 90.79, 90.79, 90.79, 90.79	20	51142.8	1.34918	35227.4	0.929318		19, 10	42779922, 91778925	42779998, 91779000	96.20%, 90.80%	2	946.892	0.0249795		NA	NA	NA	NA	NA	NA	NA		0.525139	1.38534e-05		19623.9	0.517689
MSat15	X, X, X	113503757, 113488646, 75549911	113503683, 113488572, 75549837	96, 96, 96	3	21447.3	1.94197	11707.3	1.06004		X, X	115359735, 115434107	115359809, 115434182	98.70%, 94.60%	2	8015.97	1.32989		X	114277281	114277356	0.928	1	12.9708	0.00117712		2818.56	0.467612		9893.01	0.895785
MAFG	5	1272595	1272688	100	1	630.145	0.96676	604.048	0.926723		17	82130936	82131029	1	1	680.134	1.04345		16	77347605	77347697	0.91	1	0.534183	0.000819537		663.029	1.01721		624.424	0.957982
MAGEA2	X, X	151056234, 151019756	151056305, 151019684	97.22, 93.15	2	1420.55	1.27124	1692.76	1.51457		X, X	152230293, 152251874	152230365, 152251946	100.00%, 93.20%	2	931.2	1.57108		X, X	150806491, 150856688	150806563, 150856760	95.90%, 93.20%	2	1052.87	0.942023		365.322	0.616356		1251.66	1.12005
MAGEA9	X	147824988	147824915	100	1	1006.97	0.996911	1004.44	0.993941		X	149274669	149274742	0.987	1	895.894	1.6641		NA	NA	NA	NA	NA	NA	NA		500.347	0.929382		2683.55	2.65711
MGC59937	9	121236507	121236436	95.83	1	588.786	0.933114	669.995	1.06181		9	137478683	137478755	0.987	1	727.209	1.15249		NA	NA	NA	NA	NA	NA	NA		265.273	0.420406		574.445	0.910385
MRC1	10	18374489	18374405	97.65	1	340.634	0.911433	479.809	1.28382		10	18500837	18500921	1	1	334.918	0.896138		9	18145360	18145444	0.942	1	282.987	0.757187		393.791	1.05366		334.546	0.895143
MUC12	7	98772490	98772415	97.37	1	3350.62	1.16703	2128.48	0.741357		7	100875038	100875113	0.987	1	3426.17	1.19334		NA	NA	NA	NA	NA	NA	NA		1632.61	0.568643		2998.42	1.04436
MUC5AC	NA	NA	NA	NA	NA	NA	NA	NA	NA		11	1289333	1289415	1	1	3951.84	1.86834		NA	NA	NA	NA	NA	NA	NA		3389.57	1.60251		2201.26	1.0407
NBPF10	1, 1, 1, 1, 1, 1, 1, 1, 1, 1, 1, 1, 1, 1, 1, 1	125271351, 126078024, 128061386, 127256868, 126073276, 127803755, 127806915, 128360699, 22250808, 127805282, 125288763, 124431360, 124462923, 128058282, 127791931, 128362224	125271450, 126078123, 128061485, 127256769, 126073374, 127803656, 127806816, 128360601, 22250907, 127805184, 125288862, 124431458, 124463021, 128058380, 127791833, 128362126	100, 100, 99, 99, 98.99, 98, 98, 92.93, 92, 92, 91, 91, 91, 91, 91, 90.91	16	14765.6	0.606393	12420.9	0.510102		1, 1, 1_random, 1_random, 1_random, 1_random, 1_random, 1_random, 1_random, Un, Un, Un, Un, 1, 1, 1, 1_random, 1_random, 1_random, 1_random, Un, 1_random, 1, 1_random, Un, 1, 1, 1, 1	114513123, 113112054, 6461969, 7016418, 9370026, 5997078, 5320041, 5287400, 5225036, 54408515, 22624100, 12059463, 9088775, 113120885, 111308432, 111521769, 6018160, 6010612, 5981828, 5277780, 31284178, 8442357, 111526492, 6025429, 53829084, 111303295, 21614714, 128520898, 128522427	114513222, 113112153, 6462068, 7016517, 9370125, 5997177, 5320140, 5287499, 5225135, 54408614, 22624199, 12059562, 9088874, 113120984, 111308531, 111521867, 6018259, 6010711, 5981927, 5277878, 31284277, 8442456, 111526589, 6025528, 53829181, 111303393, 21614813, 128520996, 128522525	100.00%, 100.00%, 100.00%, 100.00%, 100.00%, 100.00%, 100.00%, 100.00%, 100.00%, 100.00%, 100.00%, 100.00%, 100.00%, 99.00%, 99.00%, 99.00%, 99.00%, 99.00%, 99.00%, 99.00%, 99.00%, 98.00%, 97.00%, 97.00%, 97.00%, 96.00%, 93.00%, 91.00%, 91.00%	29	12366.5	0.507865		1	94124527	94124625	0.925	1	823.02	0.0337997		1233.23	0.0506461		12344.5	0.506962
NBPF11	1, 1, 1, 1, 1, 1, 1, 1	127968425, 128056078, 125231117, 127262176, 126246788, 128370607, 128365978, 125285032	127968503, 128056156, 125231195, 127262098, 126246710, 128370529, 128365900, 125285110	98.73, 98.73, 97.47, 97.47, 96.2, 92.41, 92.41, 91.14	8	6608.77	0.870345	10396.6	1.36918		1_random, 1_random, 1_random, 1_random, 1_random, Un, 1, Un, 1, 1	8447680, 7021740, 5974729, 5314787, 5979639, 54147037, 114518430, 9083475, 112989237, 21610980	8447758, 7021818, 5974807, 5314865, 5979717, 54147115, 114518508, 9083553, 112989315, 21611058	98.80%, 98.80%, 98.80%, 98.80%, 98.80%, 98.80%, 97.50%, 97.50%, 93.70%, 91.20%	10	5187.55	0.683178		1, 1	126401270, 126505619	126401348, 126505697	93.70%, 91.20%	2	1794.86	0.236374		3519.72	0.463531		4265.38	0.561732
NBPF16	1, 1, 1, 1, 1, 1, 1, 1	127262543, 127968058, 125230750, 128055711, 128370974, 128366345, 17268801, 125284665	127262637, 127967964, 125230656, 128055617, 128371068, 128366439, 17268707, 125284571	100, 100, 100, 98.95, 95.79, 95.79, 94.74, 91.58	8	3851.52	1.63553	5530.05	2.34831		1, 1_random, 1_random, 1_random, Un, Un, 1_random, 1_random, 1	114518875, 5314326, 8448125, 5975174, 54146576, 9083014, 5979178, 7022185, 21610519	114518969, 5314420, 8448219, 5975268, 54146670, 9083108, 5979272, 7022279, 21610613	100.00%, 100.00%, 100.00%, 100.00%, 100.00%, 100.00%, 99.00%, 99.00%, 94.80%	9	3104.49	1.31831		1	126400809	126400903	0.937	1	1274.91	0.541384		1839.22	0.781015		1978.85	0.840311
NDUFB4	3	120413143	120413045	98.99	1	386.588	0.674193	435.648	0.75975		3	124905365	124905464	1	1	660.519	1.15192		2	40651714	40651813	0.97	1	421.343	0.734802		587.382	1.02437		424.508	0.740323
NEB	2b, 2b	39094623, 39084048	39094524, 39083949	98, 96	2	478.497	0.777798	609.936	0.991454		2b, 2b, 2b	156114246, 156124929, 156135955	156114345, 156125028, 156136054	96.00%, 96.00%, 96.00%	3	625.213	1.01629		12	15279122	15279221	0.93	1	0.649953	0.0010565		6.60894	0.0107429		499.476	0.811901
NPB	5	1289077	1289006	98.61	1	276.299	0.846409	306.109	0.937729		17	82113848	82113919	0.973	1	299.612	0.917827		NA	NA	NA	NA	NA	NA	NA		315.704	0.967122		257.079	0.787531
NPIP	16, 16, 16, 16, 16, 2b, 16, 11	12407557, 30315321, 29368878, 22061089, 15401444, 91334188, 12408542, 3315757	12407656, 30315420, 29368977, 22061188, 15401345, 91334089, 12408641, 3315856	100, 99, 99, 98, 98, 98, 97, 93	8	10809	0.759605	14102.6	0.991065		16, 16, 16_random, 16_random, 16_random, 16, 16, 16_random, 16_random, 16_random, 16_random, Un, Un, Un, 16_random, 16_random, 16_random, 16_random, 16_random, 16, 18, 16_random	74285081, 70030340, 6070677, 3562843, 2473037, 16616733, 30613598, 3774522, 3827897, 3970144, 1225657, 56925706, 23820668, 57684708, 3547683, 3764900, 1265652, 3018414, 3097110, 28940837, 4917464, 2493101	74285180, 70030439, 6070776, 3562942, 2473136, 16616832, 30613697, 3774621, 3827996, 3970243, 1225756, 56925805, 23820767, 57684805, 3547782, 3764999, 1265751, 3018513, 3097208, 28940936, 4917561, 2493199	100.00%, 100.00%, 100.00%, 100.00%, 100.00%, 99.00%, 99.00%, 99.00%, 99.00%, 99.00%, 99.00%, 99.00%, 99.00%, 99.00%, 98.00%, 98.00%, 98.00%, 98.00%, 98.00%, 94.90%, 94.90%, 94.00%	22	37983.1	2.66928		14	3269317	3269416	0.92	1	9.62351	0.000676297		6697.7	0.470684		44196	3.10589
NXF2	X, X, X	99907235, 99905271, 99819135	99907334, 99905370, 99819036	100, 100, 100	3	1259.72	0.97407	1375.39	1.06297		X	101975150	101975249	1	1	609.522	0.915584		X	100832747	100832846	0.96	1	1148.82	0.888259		642.694	0.965413		1161.7	0.898309
OPN1MW	X	152559810	152559714	98.97	1	1627.35	1.00214	1632.7	1.00584		X	153570022	153570118	0.98	1	550.678	0.64361		X	152281703	152281799	0.928	1	542.961	0.334459		588.195	0.687459		1166.69	0.718809
ORM1	9, 9	97218488, 97207375	97218418, 97207305	100, 100	2	781.793	0.922679	599.926	0.708038		9_random	2122016	2122086	1	1	997.889	1.17772		NA	NA	NA	NA	NA	NA	NA		415.753	0.490675		799.35	0.943399
P4HB	5	1341689	1341783	96.84	1	253.322	0.99685	368.523	1.45018		17	82060400	82060494	0.99	1	370.224	1.45688		NA	NA	NA	NA	NA	NA	NA		172.544	0.678981		309.557	1.21814
PCYT2	5	1280798	1280868	95.77	1	0.574426	0.0011959	13.4691	0.0280414		17	82122381	82122451	1	1	515.372	1.07296		16	77338793	77338863	0.944	1	366.67	0.763374		473.505	0.985795		459.493	0.956624
RHOXF2	X	117734032	117733943	96.67	1	611.763	0.930722	682.949	1.0387		X	119620422	119620511	0.967	1	350.61	0.989103		X, X	118384507, 118393737	118384596, 118393826	94.50%, 94.50%	2	320.923	0.488173		202.64	0.571667		1746.45	2.65529
PGA3	11, 11	58098958, 58144008	58098870, 58143920	97.75, 96.63	2	708.267	0.918808	796.001	1.03262		11, 11	59485443, 59517587	59485531, 59517675	98.90%, 95.60%	2	558.524	0.724552		14, 14, 14	12842780, 12864442, 12907627	12842868, 12864530, 12907715	95.60%, 94.40%, 92.20%	3	684.664	0.888189		278.287	0.361011		739.375	0.959163
PGAM4	X	75277336	75277237	98	1	529.046	1.06713	556.354	1.12159		X	77393911	77394010	0.99	1	244.691	0.918963		NA	NA	NA	NA	NA	NA	NA		215.655	0.809913		509.472	1.02678
PLGLB2	6	162257720	162257819	98	1	1990.38	1.05173	2005.42	1.05967		2a, 2a	107506585, 88919706	107506685, 88919805	99.00%, 98.00%	2	1574.56	0.832002		4	157600266	157600365	0.97	1	460.395	0.243274		555.659	0.293612		1456.57	0.769658
PPIAP21	1, 17	124229664, 46756288	124229565, 46756190	100, 94.95	2	372.802	0.464466	469.799	0.585311		1, 1_random, 5	128131834, 4915252, 65383076	128131933, 4915351, 65383174	100.00%, 99.00%, 91.00%	3	421.222	0.524791		6	48166410	48166509	0.94	1	124.548	0.155171		233.55	0.290974		267.075	0.332742
PRAMEF14	1, 1	13125069, 13204590	13125168, 13204689	95, 94	2	2224.75	2.16018	7075.69	6.87032		1, Un, 1_random, 1_random	13119228, 49184537, 4788296, 4823684	13119327, 49184636, 4788395, 4823782	96.00%, 96.00%, 95.00%, 95.00%	4	18270.4	17.7402		NA	NA	NA	NA	NA	NA	NA		35.8916	0.0348499		2521.12	2.44795
PRAMEF20	1	13744424	13744331	95.74	1	313.062	1.1666	667.051	2.4857		1	13548232	13548325	0.99	1	3457.55	12.8842		1	16037222	16037315	0.947	1	392.333	1.46199		267.713	0.997606		339.544	1.26528
PRAMEF5	1, 1, 1, 1, 1, 1, 1, 1, 1, 1, 1	13558244, 13364264, 13367696, 13307487, 13516980, 13361885, 13637804, 13815271, 13310648, 13624443, 13801910	13558336, 13364172, 13367604, 13307395, 13516888, 13361793, 13637896, 13815363, 13310556, 13624535, 13802002	97.85, 97.85, 97.85, 96.77, 96.77, 95.7, 95.7, 95.7, 95.7, 92.47, 92.47	11	4697.08	1.17772	3025.25	0.758534		1_random, 1_random, 1_random, 1_random, 1_random, Un, 1_random, 1_random, 1_random, 1_random, 1_random, Un, Un, Un, Un, Un, Un, 1_random, Un, 1_random, 1, 1_random, 1_random, Un, Un, 1_random, 1_random, 1_random	4452388, 4327398, 4123569, 1097167, 4538142, 18427897, 4398562, 4368286, 4245810, 4612759, 4504646, 13535229, 54221384, 52764494, 42083222, 13538408, 21687198, 4614690, 53583056, 4270810, 13160172, 4586589, 4554149, 12649725, 31218199, 4581565, 4580433, 4578849	4452480, 4327490, 4123661, 1097259, 4538234, 18427989, 4398654, 4368378, 4245902, 4612851, 4504738, 13535321, 54221476, 52764586, 42083314, 13538500, 21687290, 4614782, 53583148, 4270902, 13160264, 4586681, 4554241, 12649817, 31218291, 4581657, 4580525, 4578941	99.00%, 99.00%, 99.00%, 99.00%, 99.00%, 99.00%, 97.90%, 97.90%, 97.90%, 97.90%, 97.90%, 97.90%, 97.90%, 97.90%, 96.80%, 96.80%, 95.70%, 94.70%, 94.70%, 93.60%, 92.50%, 92.50%, 92.50%, 92.50%, 92.50%, 91.40%, 91.40%, 91.40%	28	4010.68	1.00562		NA	NA	NA	NA	NA	NA	NA		348.24	0.0873159		10732.7	2.69105
PRAMEF8	1	13589473	13589553	100	1	331.444	0.703946	344.382	0.731425		1_random, 1_random, 1_random, 1, 1	4320766, 4702156, 4703444, 13414104, 12988834	4320846, 4702236, 4703524, 13414182, 12988914	98.80%, 98.80%, 98.80%, 93.70%, 90.20%	5	307.458	0.653003		NA	NA	NA	NA	NA	NA	NA		312.45	0.663606		2591.09	5.50317
PRR11	NA	NA	NA	NA	NA	NA	NA	NA	NA		17, 17	58407265, 58408603	58407352, 58408690	100.00%, 100.00%	4	727.209	1.22856		16	43447377	43447464	0.966	1	0.697356	0.00117813		264.459	0.446783		342.043	0.577855
PRR20A	NA	NA	NA	NA	NA	9.76523	0.0038439	12.8803	0.00507008		NA	NA	NA	NA	NA	95.6208	0.0376393		NA	NA	NA	NA	NA	0.997263	0.000392554		0.286029	0.00011259		344.542	0.135622
PRR20A (probe2)	13, 13	39531516, 39530227	39531419, 39530130	96.94, 96.94	2	15344.6	7.88087	8014.84	4.11635		13_random	9012420	9012519	0.96	1	9059.46	4.65286		17	36173535	36173636	0.909	1	-0.418414	-0.000214894		13.1162	0.00673636		5384.91	2.76564
PRY2	NA	NA	NA	NA	NA	NA	NA	NA	NA		Y, Y, Y, Y	11573860, 3675347, 10611536, 2642759	11573959, 3675446, 10611635, 2642858	98.00%, 98.00%, 98.00%, 98.00%	4	888.048	1.0574		NA	NA	NA	NA	NA	NA	NA		0.965361	0.00114945		0.807086	0.000960995
PSG11	19	40491982	40491888	94.74	1	800.175	1.52239	4025.05	7.65796		19, 19, 19, 19, X	48471279, 48575688, 48293277, 48635878, 6842587	48471373, 48575781, 48293371, 48635972, 6842681	99.00%, 99.00%, 97.90%, 97.90%, 97.90%	5	5328.78	10.1384		X	4592772	4592866	0.979	1	245.051	0.466228		5254.71	9.99749		1059.24	2.01528
PSG3	19, 19, 19, 19, 19	40461599, 40209289, 40407100, 40307135, 40405323	40461505, 40209195, 40407006, 40307041, 40405417	97.89, 96.84, 96.84, 95.79, 94.74	5	2477.5	0.557146	1076.28	0.242036		19, 19, 19, 19, 19, 19, 19, 19, 19	48813137, 48749271, 48730121, 48391425, 48229782, 48605982, 48430937, 48255018, 48547968	48813231, 48749365, 48730215, 48391519, 48229876, 48606076, 48431031, 48255112, 48548061	99.00%, 99.00%, 99.00%, 99.00%, 97.90%, 96.90%, 96.90%, 95.80%, 94.70%	9	1386.26	0.311745		19, 19, 19, 19	49755955, 49321224, 49261264, 49659309	49756049, 49321318, 49261358, 49659403	94.80%, 94.80%, 92.70%, 90.60%	4	6642.87	1.49387		53.7866	0.0120957		5434.89	1.22221
PTPN20A	10, 10	59640039, 57908241	59639940, 57908142	99, 99	2	381.993	1.18171	411.506	1.27301		10_random	5881828	5881927	0.99	1	523.218	1.61859		9	48588609	48588708	0.96	1	361.091	1.11705		306.756	0.948961		329.548	1.01947
PYCR1	5	1251502	1251581	98.75	1	437.138	0.955466	396.197	0.865981		17	82150824	82150903	0.988	1	562.447	1.22936		16	77367237	77367316	0.938	1	43.0966	0.0941976		31.8246	0.06956		471.988	1.03164
RBMY1E	NA	NA	NA	NA	NA	NA	NA	NA	NA	NA	Y, Y, Y, Y, Y, Y, Y, Y, Y, Y, Un, Y	9612677, 8144124, 4356800, 14405427, 13572515, 9183052, 14102034, 8881023, 8449465, 7713978, 54825967, 9917463	9612775, 8144222, 4356898, 14405525, 13572613, 9183150, 14102132, 8881121, 8449563, 7714076, 54826065, 9917560	95.00%, 95.00%, 95.00%, 95.00%, 95.00%, 95.00%, 94.00%, 94.00%, 94.00%, 94.00%, 94.00%, 90.80%	12	2727.89	1.12617	NA	NA	NA	NA	NA	NA	NA	NA		1688.74	0.697172		7.18446	0.00296601
REXO1L1	8, 8, 8, 8, 8, 8, 8, 8, 8, 8, 8, 8, 8, 8, 8, 8, 9, 12, 11, 2b	84293395, 84294841, 84296256, 84349027, 84367105, 84373076, 84381636, 84383340, 84387126, 84392773, 84400447, 84404719, 84441238, 84442963, 84445272, 84449780, 21940494, 130583732, 105941044, 49043153	84293326, 84294772, 84296187, 84348958, 84367036, 84373007, 84381567, 84383271, 84387057, 84392704, 84400378, 84404650, 84441169, 84442894, 84445203, 84449711, 21940563, 130583801, 105941113, 49043084	98.57, 98.57, 98.57, 98.57, 98.57, 98.57, 98.57, 98.57, 98.57, 98.57, 98.57, 98.57, 98.57, 98.57, 98.57, 98.57, 98.57, 98.57, 98.57, 98.57	20	167177	5.2641	71297.5	2.24503		8, 8, Un, Un, Un, 8_random, 8	84339047, 84457266, 58436299, 54899906, 23258062, 3312595, 84508369	84339116, 84457335, 58436368, 54899975, 23258131, 3312664, 84508438	97.20%, 97.20%, 97.20%, 97.20%, 97.20%, 95.80%, 94.30%	7	100875	3.17638		8	88104039	88104108	0.943	1	4170.33	0.131316		36384.6	1.14569		88659.7	2.79174
REXO1L1 (probe2)	8, 8, 8, 8, 8, 8, 8, 8, 8, 8, 8, 8, 8, 8, 8, 8, 22, 15	84297476, 84300947, 84303611, 84305185, 84309376, 84310666, 84312378, 84384560, 84388345, 84393992, 84403777, 84405939, 84407665, 84444183, 84448562, 84474550, 4131125, 73395217	84297400, 84300871, 84303535, 84305109, 84309300, 84310590, 84312302, 84384484, 84388269, 84393916, 84403701, 84405863, 84407589, 84444107, 84448486, 84474474, 4131049, 73395141	100, 100, 100, 100, 100, 100, 100, 100, 100, 100, 100, 100, 100, 100, 100, 100, 100, 96.1	18	115341	4.81908	58512.6	2.44473		8, 8, 8, Un, 8, 8	84342505, 84483340, 84340260, 57777491, 84458513, 84507150	84342581, 84483416, 84340336, 57777567, 84458589, 84507226	100.00%, 100.00%, 98.80%, 98.80%, 97.50%, 97.50%	6	79954.2	3.34059		NA	NA	NA	NA	NA	NA	NA		26904.4	1.1241		60046.8	2.50883
RGPD1	2a	89543609	89543700	96.81	1	441.733	0.911317	586.973	1.21095		2a, 2a	113242468, 89016408	113242561, 89016501	99.00%, 99.00%	2	778.207	1.60548		NA	NA	NA	NA	NA	NA	NA		449.103	0.926521		511.971	1.05622
RGPD6	X, 2a	2741831, 106570441	2741731, 106570341	95.05, 93.07	2	0.574426	0.000425987	5.22571	0.00387532		2a, 2a_random, 2a_random, Un, 2a	111079571, 1330114, 1531070, 56891440, 109942181	111079671, 1330214, 1531170, 56891540, 109942282	96.00%, 96.00%, 96.00%, 95.00%, 93.50%	5	0.297629	0.000220718		NA	NA	NA	NA	NA	NA	NA		1.72849	0.00128183		37.1718	0.0275661
RPS17	15, 15	62717584, 62464332	62717485, 62464233	96, 96	2	460.115	0.822481	520.437	0.93031		15	80433558	80433657	0.98	1	617.367	1.10358		7	63994216	63994315	0.91	1	453.7	0.811014		1102.27	1.97037		571.946	1.02239
RSPH10B	NA	NA	NA	NA	NA	NA	0.949859	1185.21	1.05538		7, 7	5953009, 5956190	5953096, 5956276	100.00%, 98.90%	2	1319.57	1.17502		NA	NA	NA	NA	NA	NA	NA		1041.26	0.927201		1034.25	0.920957
SCRT1	8	144878117	144878044	100	1	368.207	1.08472	316.119	0.93127		NA	NA	NA	NA	NA	NA	NA		8	146960973	146961046	0.96	1	220.504	0.649594		405.992	1.19603		324.55	0.956109
SCXB	8	144754456	144754528	100	1	487.687	6.97333	326.717	4.67166		8	144253139	144253211	1	1	362.378	5.18157		NA	NA	NA	NA	NA	NA	NA		31.8246	0.455053		536.961	7.67788
SERF1B	NA	NA	NA	NA	NA	NA	NA	NA	NA		5	45859822	45859921	0.96	1	319.227	0.55607		NA	NA	NA	NA	NA	NA	NA		339.293	0.591024		414.512	0.722051
SFTPA1	10, 10, 10	92809312, 92560149, 92755098	92809228, 92560065, 92755182	98.82, 98.82, 97.65	3	836.938	0.704522	932.017	0.784557		10, 10	80172687, 80230867	80172771, 80230951	100.00%, 98.90%	2	1390.18	1.17023		NA	NA	NA	NA	NA	NA	NA		1037.2	0.873096		851.827	0.717055
SIRT7	5	1276936	1277023	100	1	483.092	0.769953	559.887	0.89235		17	82126594	82126681	1	1	691.903	1.10276		16	77342627	77342713	0.989	1	489.405	0.780014		567.047	0.903761		651.912	1.03902
SMN2	17, 17	27019125, 26569004	27019224, 26569103	100, 100	2	432.542	0.333413	711.801	0.548672		5	45888664	45888763	0.99	1	483.989	0.373069		6	67566623	67566722	0.95	1	508.373	0.391865		694.752	0.53553		606.931	0.467836
SNAR-A1	19, 19, 19, 19	45358774, 45311137, 47597844, 47641615	45358873, 45311236, 47597745, 47641516	97, 97, 97, 97	4	15229.7	2.97047	13396.6	2.61293		19	53563943	53564042	0.98	1	617.367	0.120414		9, 6	106922002, 12770979	106922102, 12771078	94.00%, 90.40%	2	0.649953	0.00012677		0.915083	0.000178482		509.472	0.0993696
SPAG11	8	7524819	7524901	93.98	1	340.634	0.363051	423.871	0.451766		8	7544536	7544618	0.964	1	1233.26	1.31442		NA	NA	NA	NA	NA	NA	NA		0.915083	0.000975305		891.811	0.950501
SPANXA1	NA	NA	NA	NA	NA	133.841	0.140254	314.352	0.328655		NA	NA	NA	NA	NA	0.297629	0.000619777		NA	NA	NA	NA	NA	2.9289	0.00314001		12.3028	0.0256191		4.68552	0.00523336
SPDYE3	7, 7, 7, 7, 7, 7, 7	5050403, 74277672, 64391498, 100385108, 100482060, 100482658, 5044199	5050311, 74277581, 64391589, 100385199, 100482151, 100482749, 5044291	98.92, 98.91, 97.83, 97.83, 97.83, 97.83, 95.7	7	17559.6	0.709697	21721.2	0.877895		7, 7, 7, 7, 7_random, 7_random, 7_random, 7, 7, 17, 7_random, 7_random, 7, 7_random, 7, 7, 7_random, 7_random, 7, 7_random, 7, 7, 7_random, 7_random, 7_random	5008594, 76398666, 72759781, 74873455, 5839192, 5845771, 5485055, 72758231, 66946510, 58382113, 5815078, 5154990, 102479464, 2465379, 76407732, 74874985, 2463842, 5498226, 76409274, 5829882, 100172613, 74709216, 5349042, 5338549, 5354627	5008686, 76398758, 72759873, 74873547, 5839284, 5845863, 5485147, 72758322, 66946601, 58382206, 5815169, 5155081, 102479556, 2465471, 76407823, 74875076, 2463933, 5498317, 76409366, 5829973, 100172702, 74709305, 5349131, 5338638, 5354716	99.00%, 98.90%, 98.90%, 98.90%, 98.90%, 98.90%, 98.90%, 97.90%, 97.90%, 97.90%, 97.90%, 97.90%, 97.70%, 97.70%, 96.80%, 96.80%, 96.80%, 96.80%, 96.60%, 95.70%, 95.60%, 95.60%, 95.60%, 94.40%, 94.40%	25	32950	1.33172		3, 16, 16, 3, 3	44971567, 43423376, 43425131, 44973412, 43113310	44971659, 43423468, 43425223, 44973504, 43113399	99.00%, 96.60%, 95.70%, 93.50%, 93.20%	5	2783.43	0.112496		10449.1	0.422317		34065.3	1.3768
SSX4	X, X, X, X, X, X, X, X, X, X, X	49311255, 53595229, 53610810, 53616034, 53580808, 53676277, 53731874, 49074140, 49071931, 49112689, 53581641	49311345, 53595319, 53610720, 53615944, 53580718, 53676367, 53731784, 49074051, 49071842, 49112779, 53581552	100, 98.9, 97.8, 97.8, 96.7, 95.6, 95.6, 94.44, 94.44, 93.41, 93.33	11	4494.88	0.828402	6192.47	1.14115		X, X, X, X, X, X, X	48579871, 48497963, 52997389, 53120023, 48433953, 53010236, 53024712	48579961, 48498053, 52997479, 53120113, 48434043, 53010326, 53024802	100.00%, 99.00%, 97.90%, 97.90%, 96.80%, 96.80%, 94.60%	7	2414.06	0.836656		X, X, X, X, X, X, X	46111499, 45924846, 46082106, 46236746, 46127395, 46160281, 45977469	46111589, 45924936, 46082196, 46236836, 46127485, 46160370, 45977558	97.90%, 96.80%, 96.80%, 95.70%, 94.60%, 93.40%, 92.30%	7	3863.49	0.711928		3673.45	1.27313		3900.54	0.718931
SULT1A1	16	29508619	29508525	98.95	1	1448.13	2.89222	1245.85	2.48824		16	29094227	29094321	1	1	691.903	1.38188		NA	NA	NA	NA	NA	NA	NA		324.651	0.648398		471.988	0.942661
SULT1A3	16	31034386	31034306	100	1	662.313	0.820683	641.732	0.795181		16, 17	30598666, 12855232	30598746, 12855312	100.00%, 100.00%	2	597.753	0.740685		NA	NA	NA	NA	NA	NA	NA		370.202	0.458724		561.95	0.696322
TAF9B	X	75439514	75439415	99	1	97.0779	1.46196	194.823	2.93899		X	77562639	77562738	0.99	1	56.3918	1.52973		X	76844608	76844707	0.95	1	0.697356	0.0150717		80.629	2.1872		154.622	2.33612
TAS1R3	1	1229765	1229696	94.29	1	529.046	1.12745	565.186	1.20447		1	1244586	1244655	0.958	1	480.066	1.02307		NA	NA	NA	NA	NA	NA	NA		354.747	0.756003		382.026	0.814136
TBC1D3	5, 5, 5, 5, 5, 5, 5, 5	46221175, 46097433, 47991168, 47902929, 46152601, 46143267, 23883654, 21545748	46221259, 46097349, 47991084, 47902845, 46152517, 46143183, 23883570, 21545665	100, 100, 100, 100, 100, 100, 98.82, 97.65	8	7265.91	0.788461	6167.74	0.669293		17, 17_random, 17, 17, 17	59222901, 4816452, 19452693, 20979136, 29943620	59222985, 4816536, 19452777, 20979218, 29943702	100.00%, 100.00%, 97.70%, 93.70%, 91.10%	5	4367.67	0.473958		16	26179999	26180082	0.904	1	1171.14	0.127086		669.536	0.0726548		3775.59	0.409709
TBC1D3 (probe2)	5, 5, 5, 5, 5	46240133, 23881330, 23856918, 21543420, 47900603	46240215, 23881248, 23856836, 21543338, 47900521	98.8, 98.8, 98.8, 98.8, 97.59	5	1342.43	0.909412	1145.76	0.776176		17, 17, 17_random, 17, 17	61517774, 59225236, 4818782, 19394184, 19455018	61517856, 59225318, 4818864, 19394266, 19455100	100.00%, 100.00%, 100.00%, 98.80%, 98.80%	5	758.592	0.513898		NA	NA	NA	NA	NA	NA	NA		48.0927	0.0325797		824.339	0.558437
TCEB3C	18, 18, 18, 18, 18, 18, 18, 18, 18, 18, 18, 18, 18, 18, 18, 18	44600596, 44606553, 44612509, 44616527, 44625911, 44674420, 44695655, 44706192, 44708326, 44710893, 44713129, 44754739, 44722494, 44720819, 44720189, 44716597	44600525, 44606482, 44612438, 44616456, 44625840, 44674349, 44695584, 44706121, 44708255, 44710822, 44713058, 44754668, 44722423, 44720748, 44720118, 44716526	100, 100, 100, 100, 100, 100, 100, 100, 100, 100, 100, 100, 100, 100, 100, 100	16	73329.4	9.28259	72923.2	9.23116		18, 18, 18	43231024, 43212671, 43219171	43231095, 43212741, 43219241	100.00%, 100.00%, 100.00%	3	30835.5	3.90339		18, 18	40056849, 40062358	40056920, 40062429	100.00%, 100.00%	2	12192.7	1.54344		19271.4	2.43951		16525.2	2.09188
THAP4	NA	NA	NA	NA	NA	418.756	0.812002	553.41	1.07311		NA	NA	NA	NA	NA	499.68	0.96892		NA	NA	NA	NA	NA	7.39197	0.0143336		0.101676	0.000197158		541.958	1.0509
TMEM106A	5	40865689	40865774	94.19	1	262.512	0.7444	629.956	1.78635		17	14307701	14307784	0.953	1	323.149	0.916347		16	53320952	53321036	0.93	1	328.734	0.932182		272.593	0.772986		379.527	1.07622
FAM156A	X, X	53949964, 53896589	53950044, 53896509	100, 100	2	473.901	0.96031	332.017	0.672623		X	53320131	53320211	1	1	295.689	1.14432		X	51287979	51288057	0.912	1	336.544	0.682752		385.657	1.4925		589.438	1.1933
TMPRSS11E	4, 4	77274901, 76956839	77274802, 76956740	100, 100	2	87.8871	0.362742	295.51	1.21968		NA	NA	NA	NA	NA	NA	NA		5	60923753	60923852	0.96	1	246.167	1.01602		223.789	0.923656		252.081	1.04043
TP53TG3	16, 16, 16	33990580, 33944451, 32894470	33990669, 33944540, 32894559	100, 100, 100	3	1255.12	0.927859	1522.6	1.12559		NA	NA	NA	NA	NA	NA	NA		NA	NA	NA	NA	NA	NA	NA		4.16871	0.00308176		864.322	0.638958
LOC100506776	7, 7	39158773, 39163932	39158674, 39163833	96, 96	2	515.26	0.677244	1343.01	1.76521		7, 7, 7, 7	38840082, 38851372, 38835234, 38844124	38840181, 38851471, 38835333, 38844223	97.00%, 97.00%, 96.00%, 95.00%	4	1037.12	1.36316		NA	NA	NA	NA	NA	NA	NA		407.619	0.535764		576.944	0.75832
UGT2B15	4	77066688	77066596	98.92	1	349.825	1.43027	566.364	2.31559		4, 4	61752803, 61820551	61752894, 61820642	96.80%, 92.40%	2	464.374	1.8986		NA	NA	NA	NA	NA	NA	NA		0.965361	0.0039469		329.548	1.34736
USP17	8, 8, 8, 8, 8, 8, 8, 8	11823968, 11828711, 7586808, 11993998, 11995250, 7591547, 7099948, 11832286	11823880, 11828623, 7586720, 11993910, 11995162, 7591459, 7100036, 11832198	98.88, 98.88, 97.75, 97.75, 96.63, 96.63, 96.63, 96.63	8	53105.1	1.86284	34494.9	1.21003		4, 11, 4_random, 4_random, Un, Un, 8, 11, 4_random, 8_random, Un, 12	9109064, 70093720, 6619234, 6650912, 54158996, 51910412, 7419373, 70088996, 6659243, 3178390, 16908558, 8523790	9109153, 70093808, 6619323, 6651001, 54159085, 51910501, 7419462, 70089084, 6659332, 3178479, 16908647, 8523878	98.90%, 98.90%, 98.90%, 98.90%, 98.90%, 98.90%, 97.80%, 97.80%, 97.80%, 97.80%, 97.80%, 94.40%	12	134663	4.72377		8	8343499	8343587	0.922	1	22818.2	0.800426		22519.3	0.789941		108869	3.81894
XAGE1	X	53310984	53311083	100	1	809.366	0.567422	1062.73	0.745574		X	52912475	52912574	0.99	1	652.674	0.912818		NA	NA	NA	NA	NA	NA	NA		344.986	0.482492		876.817	0.615116
XAGE2	X, X	53419373, 53189184	53419449, 53189108	97.4, 97.4	2	276.299	1.84355	195.412	1.30251		X	52442488	52442564	1	1	150.542	1.72118		X	50202228	50202304	0.923	1	160.252	1.06873		48.0927	0.549856		139.628	0.935136
XKRY2	NA	NA	NA	NA	NA	NA	NA	NA	NA		Y, Y, Y, Y, Y, Y	11999951, 12072091, 5492163, 12413459, 1828087, 2221168	12000050, 12072190, 5492262, 12413558, 1828186, 2221267	97.00%, 97.00%, 97.00%, 97.00%, 96.00%, 96.00%	6	1429.41	2.40457		NA	NA	NA	NA	NA	NA	NA		0.525139	0.000883395		12.1824	0.0204933
ZFP62	5	165765768	165765675	98.94	1	248.726	1.90524	276.079	2.11476		5	183372623	183372716	1	1	291.766	2.23492		6	177539029	177539122	0.958	1	275.177	2.10785		113.979	0.873074		207.1	1.58638
ZG16	16	30604596	30604512	98.82	1	303.871	1.29328	311.408	1.32536		16	30153287	30153371	1	1	566.37	2.41047		20	27729482	27729566	0.918	1	24.1285	0.102691		55.4134	0.23584		327.049	1.39192
ZNF658B	9	41550426	41550327	99	1	836.938	1.11975	1068.03	1.42894		9_random	2536291	2536390	1	1	566.37	0.757756		15	109577371	109577470	0.95	1	314.229	0.420412		625.612	0.837017		402.018	0.537866
